# Supplementary material for: Surface marker profiling of SH-SY5Y cells enables small molecule screens identifying BMP4 as a modulator of neuroblastoma differentiation
Source: PubMed Central journal article supplement (PMC5648761; doi:10.1038/s41598-017-13497-8), 2017-10-19
Supplement: 41598_2017_13497_MOESM1_ESM.pdf [file 41598_2017_13497_MOESM1_ESM.pdf]

## SUPPLEMENTARY INFORMATION

### **Surface marker profiling of SH-SY5Y cells enables small molecule screens identifying BMP4 as a modulator of neuroblastoma differentiation**

Fraua Christina Ferlemann<sup>1,2\*</sup>, Vishal Menon<sup>1,3\*</sup>, Alexandra Larisa Condurat<sup>1,3</sup>, Jochen Rößler<sup>4</sup>, Jan Pruszek<sup>1,5,6#</sup>

<sup>1</sup>*Emmy-Noether-Group for Stem Cell Biology, Department of Molecular Embryology, Institute of Anatomy and Cell Biology, Faculty of Medicine, University of Freiburg, Freiburg, Germany*

<sup>2</sup>*MOTI-VATE Graduate School, Faculty of Medicine, University of Freiburg, Freiburg, Germany*

<sup>3</sup>*Spemann Graduate School of Biology and Medicine and Faculty of Biology, University of Freiburg, Freiburg, Germany*

<sup>4</sup>*Department of Pediatric Hematology and Oncology, Medical Center – University of Freiburg, Faculty of Medicine, University of Freiburg, Germany*

<sup>5</sup>*Institute for Transfusion Medicine and Gene Therapy, Medical Center – University of Freiburg, Faculty of Medicine, University of Freiburg, Germany*

<sup>6</sup>*Center for Biological Signaling Studies (BIOSS), University of Freiburg, Freiburg, Germany*

\*These authors contributed equally.

#To whom correspondence should be addressed: [jan.pruszek@uniklinik-freiburg.de](mailto:jan.pruszek@uniklinik-freiburg.de)

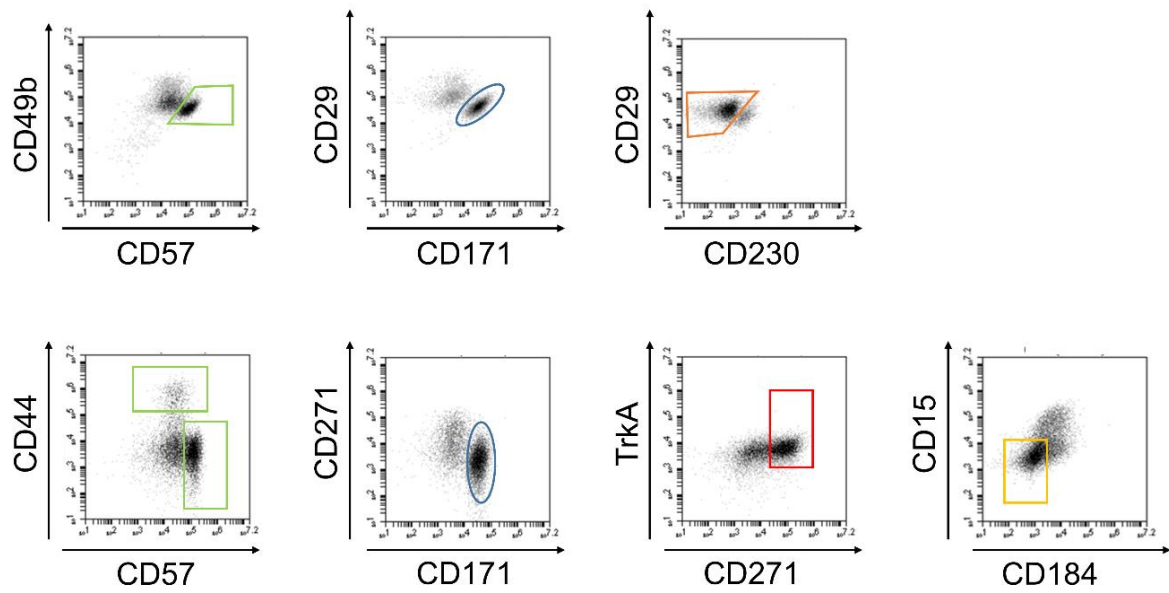

**Supplementary Figure S1.** Bivariate flow cytometry dot plots for further distinction of NB subpopulations. Shown are further subpopulations found in combinatorial flow cytometry analysis. Combinations with CD57 show subsets which are  $CD57^{\text{high}}/CD49b^+$  and  $CD57^{\text{high}}/CD44^{\text{low}}$ . In combination with CD171, a  $CD29^{\text{high}}/CD171^{\text{high}}$  and a  $CD271^{\text{low}}/CD171^{\text{high}}$  subpopulation can be defined. Furthermore, a  $CD29^+/CD230^-$  subpopulation can be defined. In conjunction with expression analysis and the high-throughput profiling results, the  $TrkA^+/CD271^{\text{high}}$  and the  $CD15^-/CD184^-$  subsets represent populations were deemed to be of particular relevance when aiming for *in vitro* screens to assess therapeutic responsiveness.

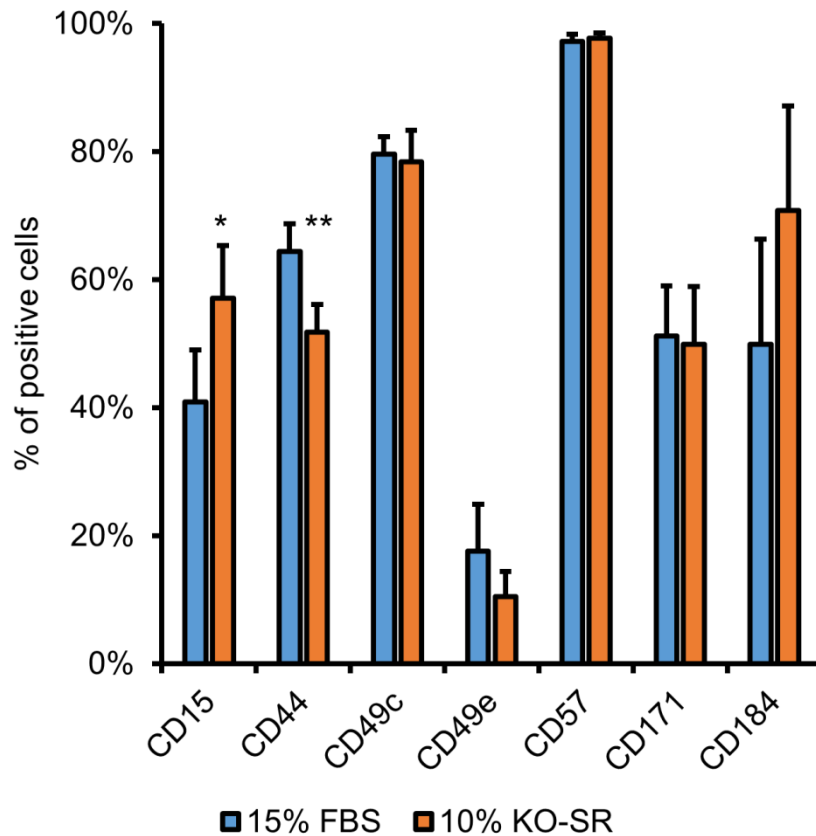

**Supplementary Figure S2.** Comparison of standard versus serum-free culturing conditions. Differences in baseline expression of a subset of surface antigens depending on culture medium conditions ( $n \geq 3$ ;  $*p \leq 0.05$ ;  $**p \leq 0.01$ ; unpaired two-tailed Student's t-test). The decrease in CD15 expression, a marker associated with neural stemness [Pruszek *et al.*, Stem Cells 2009], might be attributed to serum components promoting neural differentiation. The increase in CD44 is in keeping with reports on serum components modulating YAP via GPCR signaling [Yu *et al.*, Cell 2012] (YAP previously identified by us to be associated with CD44 expression [Hindley *et al.*, Scientific Reports 2016]).

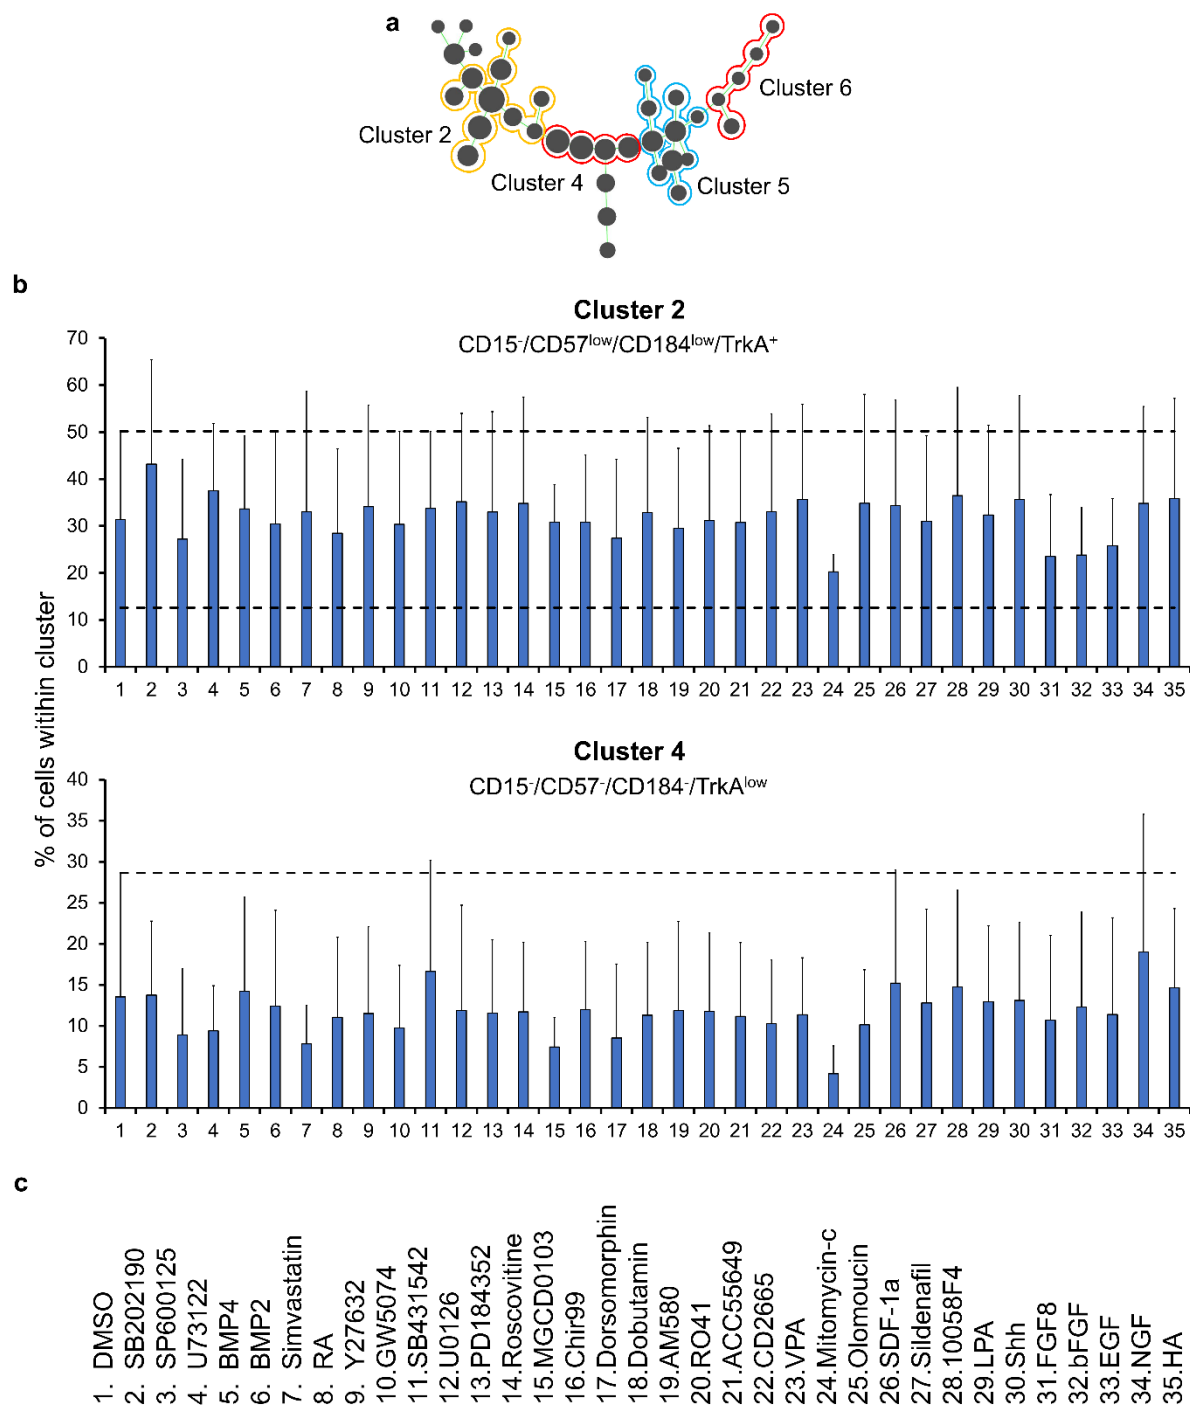

**Supplementary Figure S3.** Additional SPADE clusters analyzed in the small molecule screen. **(a)** SPADE clustering tree (see **Figure 2**). **(b)** No major changes were observed in clusters 2 and 4. Error bars represent standard deviation of the mean. Dashed lines represent standard deviations from DMSO control group.  $n \geq 3$ . **(c)** List of small molecules applied in the screen.

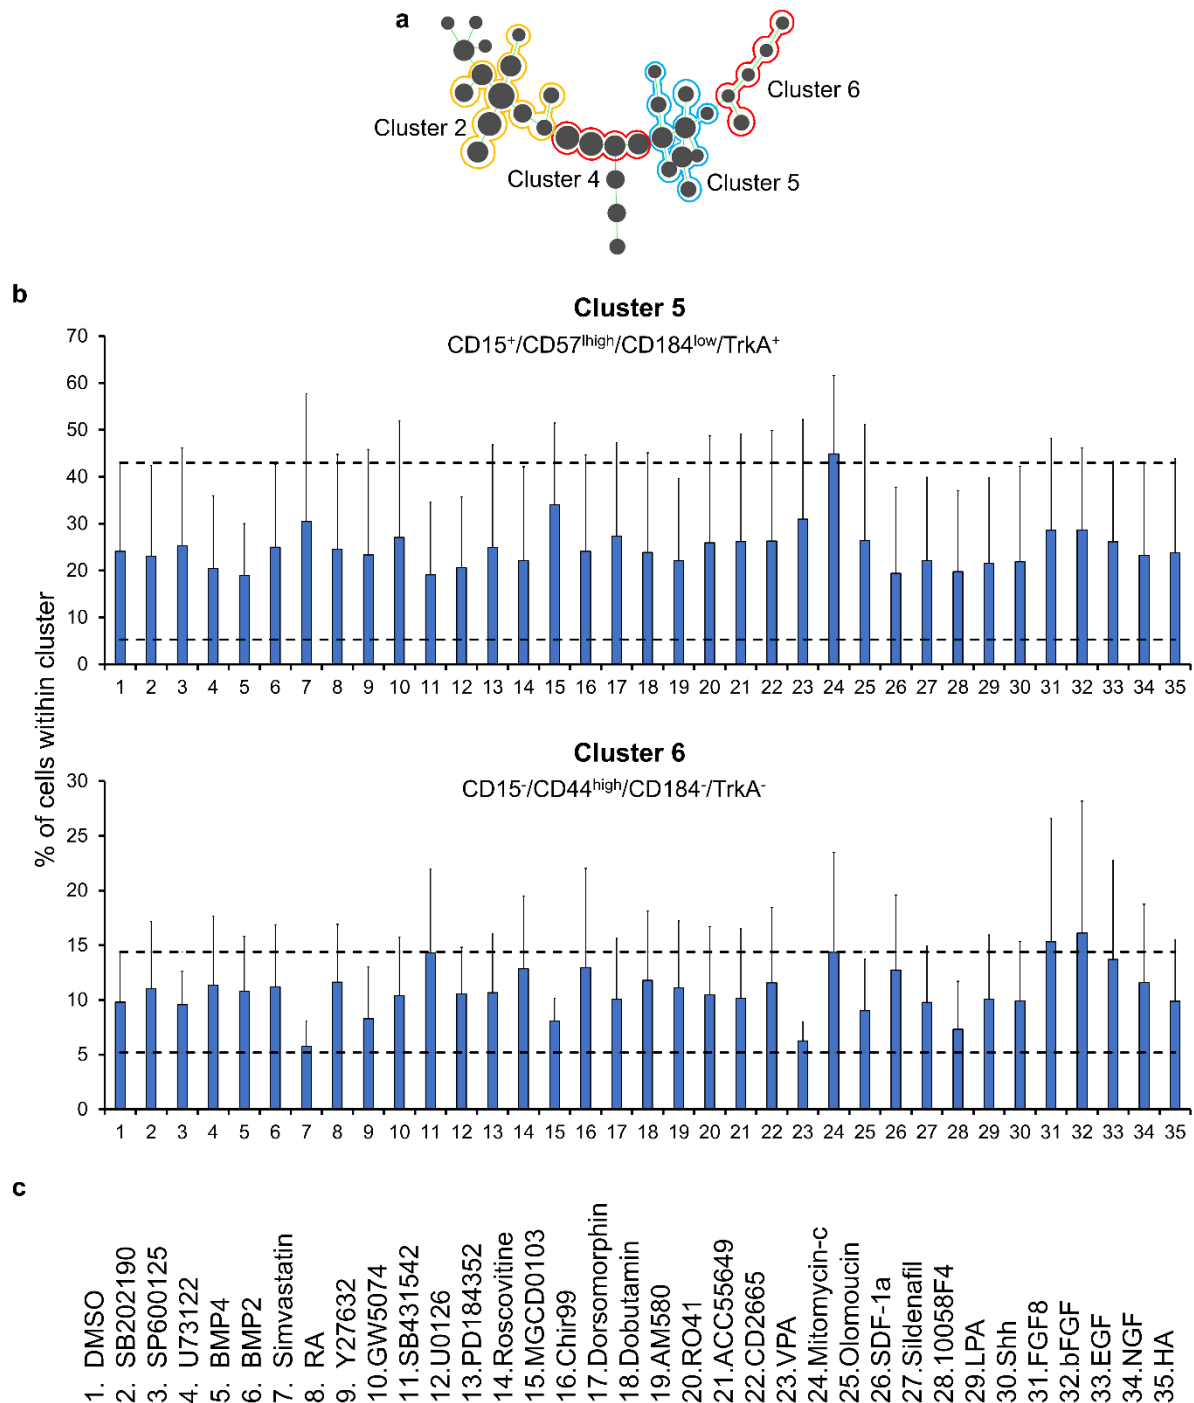

**Supplementary Figure S4.** Additional SPADE clusters analyzed in the small molecule screen. **(a)** SPADE clustering tree (see **Figure 2**). **(b)** No major changes were observed in clusters 5 and 6. Error bars represent standard deviation of the mean. Dashed lines represent standard deviations from DMSO control group.  $n \geq 3$ . **(c)** List of small molecules applied in the screen.

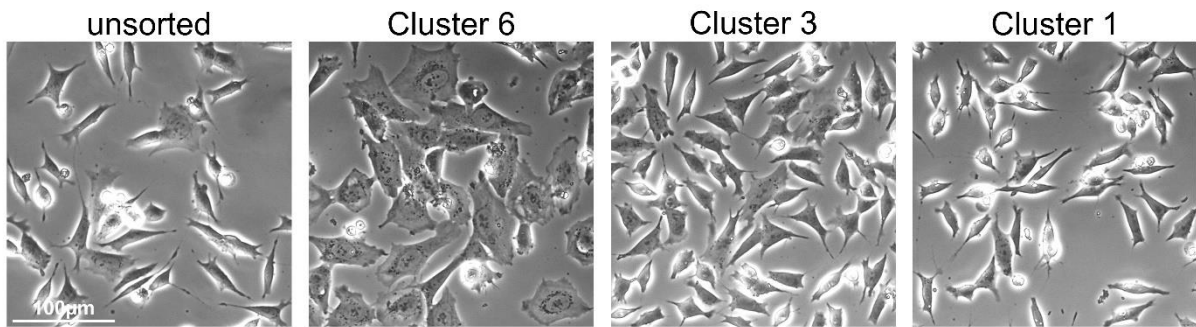

**Supplementary Figure S5.** Phase contrast images of SH-SY5Y cells sorted on the basis of  $CD15^-/CD44^+/TrkA^-$  (cluster 6),  $CD15^-/CD44^-/TrkA^+$  (cluster 3) and  $CD15^+/CD44^-/TrkA^-$  (cluster 1). Morphologically, the already described  $CD44^+$  subpopulation (cluster 6) differs drastically from the other clusters (see Hindely et al., 2016). However, despite their clearly distinct responsiveness to BMP4 treatment (see **Figure 2**), no overt morphological differences were discernible between cluster 1 versus cluster. Scale bar =100µm.

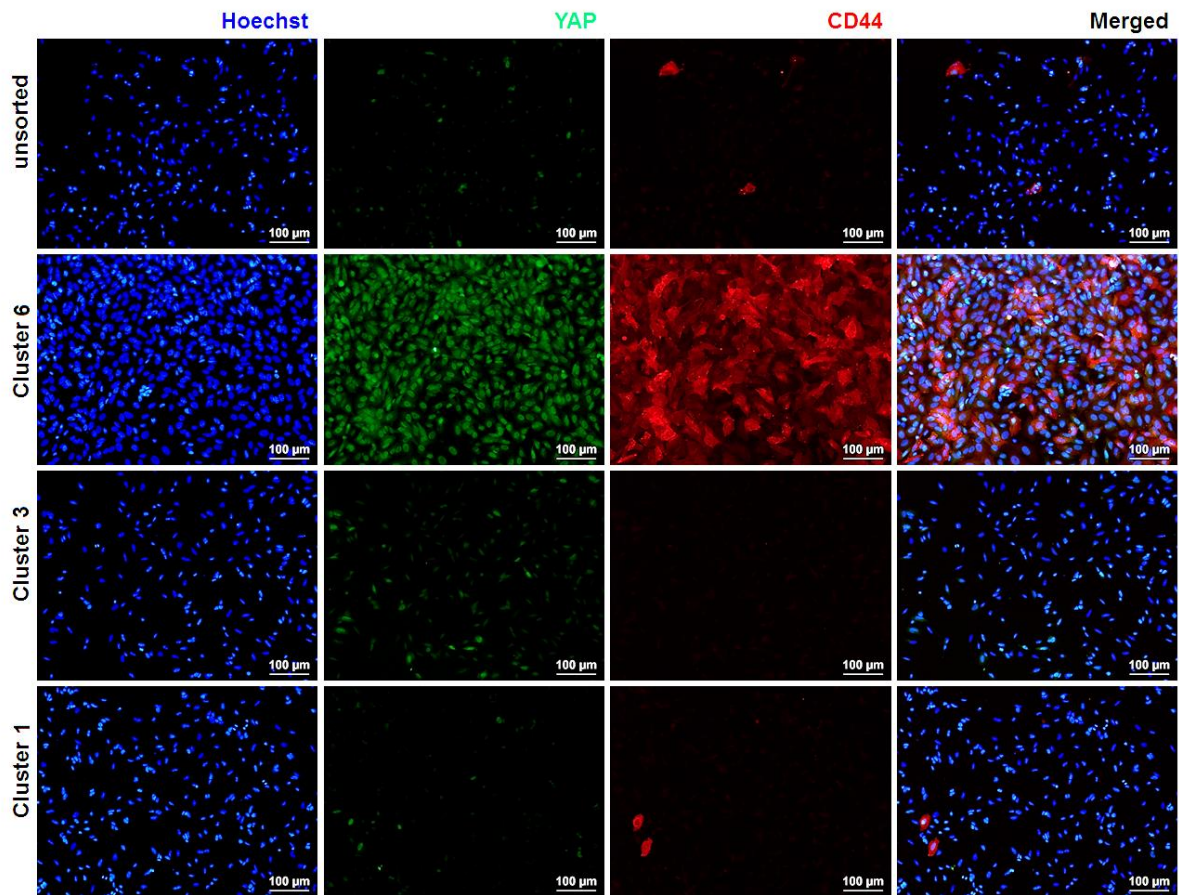

**Supplementary Figure S6.** Immunocytochemical analysis of SH-SY5Y subpopulations after FACS. Cluster 6 isolated on the basis of  $CD15^-/CD44^+/TrkA^-$  was highly positive for YAP and CD44, whereas the  $CD15^-/CD44^-/TrkA^+$  (cluster 3) and  $CD15^+/CD44^-/TrkA^-$  (cluster 1) subpopulations showed nearly no expression of either marker and no striking differences between the two. Scale bar = 100μm.

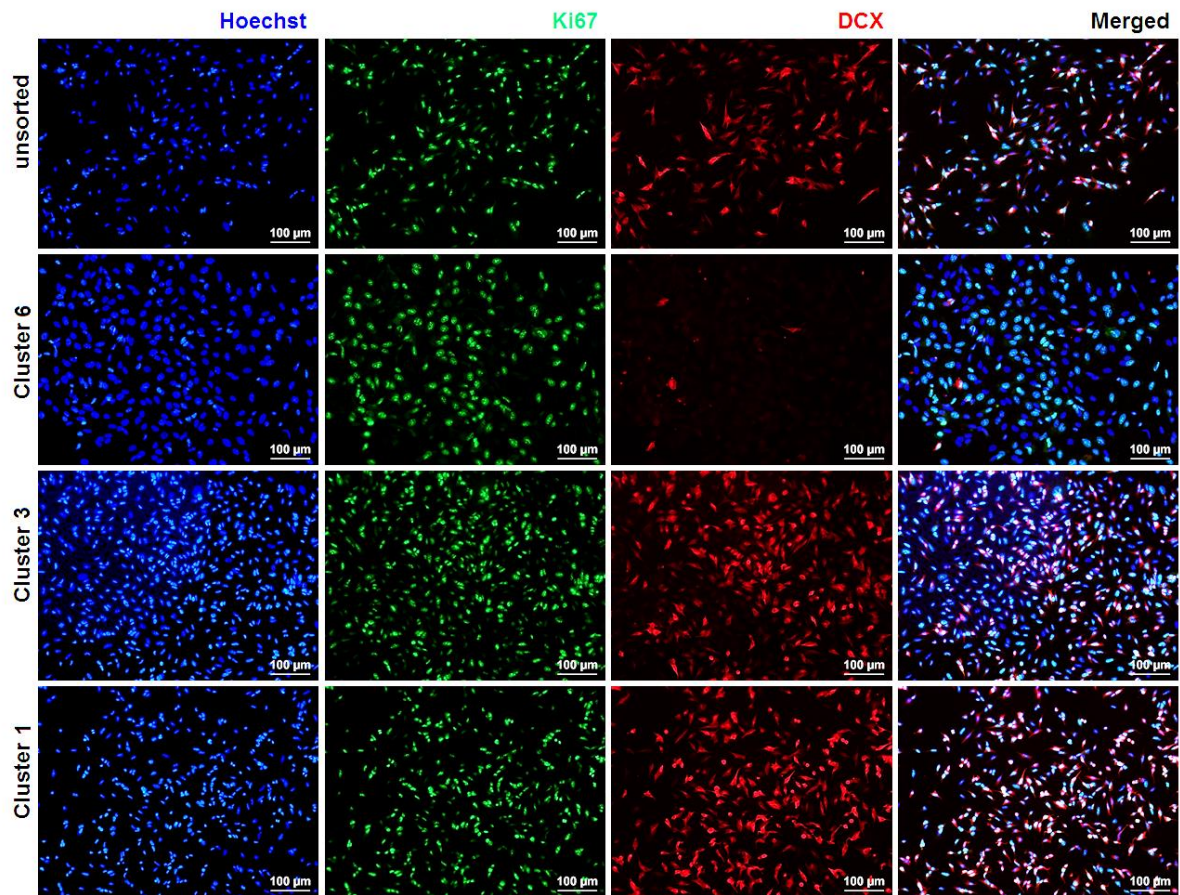

**Supplementary Figure S7.** Immunocytochemical analysis of SH-SY5Y subpopulations after FACS. Cluster 6 isolated on the basis of  $CD15^-/CD44^+/TrkA^-$  surface expression showed nearly no immunoreactivity for DCX yet maintained expression of Ki67. In the  $CD15^-/CD44^-/TrkA^+$  (cluster 3) and  $CD15^+/CD44^-/TrkA^-$  (cluster 1) subpopulations, DCX and Ki67 were found to be expressed to a similar degree. Scale bar = 100 $\mu$ m.



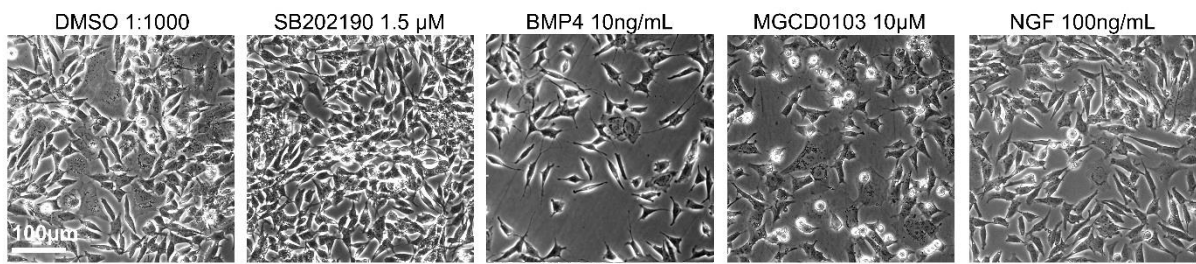

**Supplementary Figure S8.** Morphological changes upon small molecule treatment which showed changes in the surface marker expression patterns. Upon BMP4 treatment, neurite-like extensions were seen. Scale bar = 100μm.

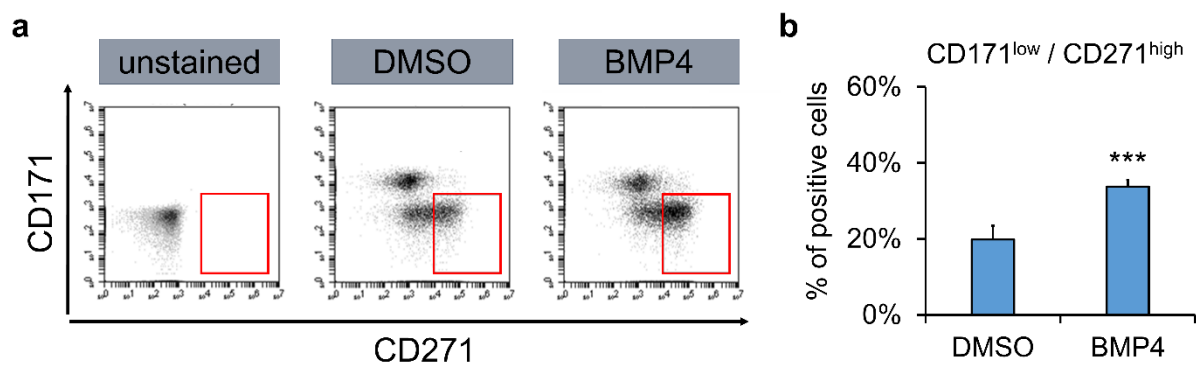

**Supplementary Figure S9.** Effects of BMP4 on CD171/CD271 combinatorial surface antigen expression. Treatment with BMP4 at a concentration of 10ng/mL over the course of three days increased the CD171<sup>low</sup>/CD271<sup>high</sup> subpopulation.  $n \geq 3$ ; \*\*\* $p \leq 0.001$  unpaired two-tailed Student's t-test.

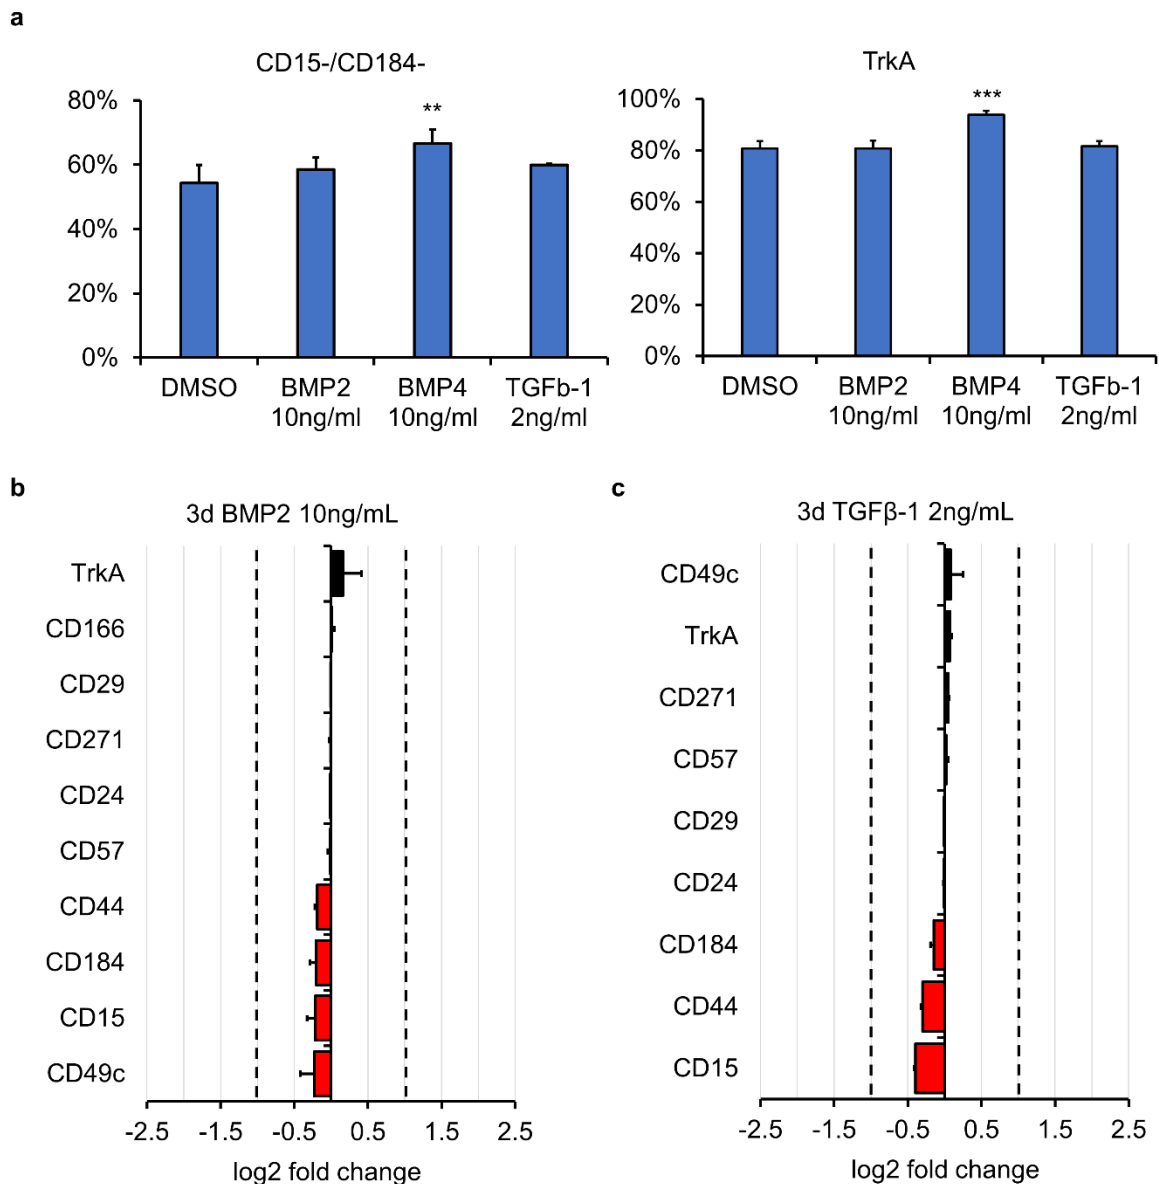

**Supplementary Figure S10.** (a) Quantification of flow cytometric data. Compared to DMSO control, only BMP4 was able to promote negativity for CD15 and CD184, while enhancing the expression of TrkA.  $n \geq 3$ ,  $**p \leq 0.01$ ,  $***p \leq 0.001$ . (b) and (c) show the effects of BMP2 and TGF $\beta$ -1 on surface marker expression. Bar graphs represent log<sub>2</sub> fold change in the expression pattern of different surface antigens after 3day 10ng/mL treatment with BMP2.  $n \geq 3$ ; dashed lines represent cutoff of 1; red bars represent down-, black bars upregulation of the indicated surface antigens; error bars represent standard error of the mean incl. error propagation.

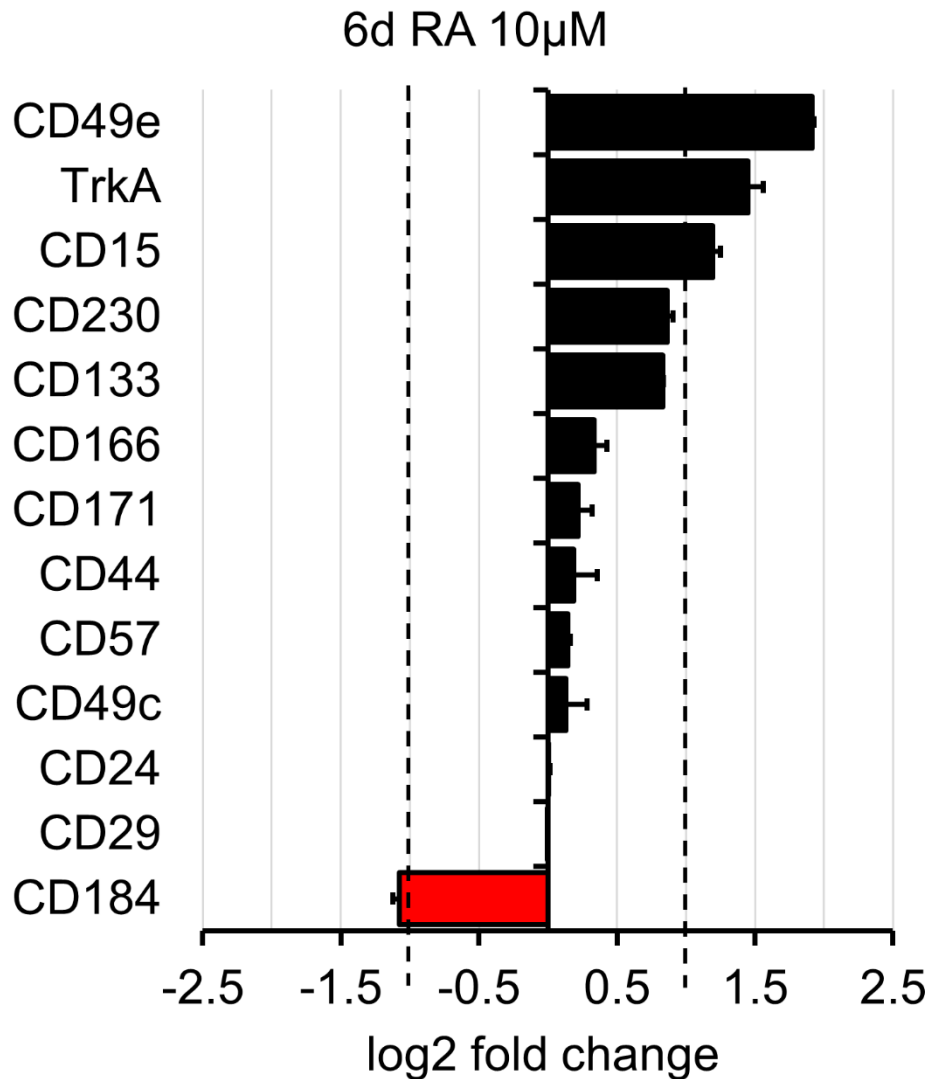

**Supplementary Figure S11.** Effects of RA on surface marker expression pattern. Six days of treatment with 10 $\mu$ M all-trans RA led to an enhancement in TrkA expression and a decrease of CD184 expression, similar to treatment with BMP4 albeit to a lesser degree. However, the expression of CD15 was enhanced upon treatment with RA. Bar graphs represent log<sub>2</sub> fold change in the expression pattern of different surface antigens after 6day 10 $\mu$ M treatment with all-trans RA.  $n \geq 3$ ; dashed lines represent cutoff of 1; red bars represent down-, black bars upregulation of the indicated surface antigens; error bars represent standard error of the mean incl. error propagation.

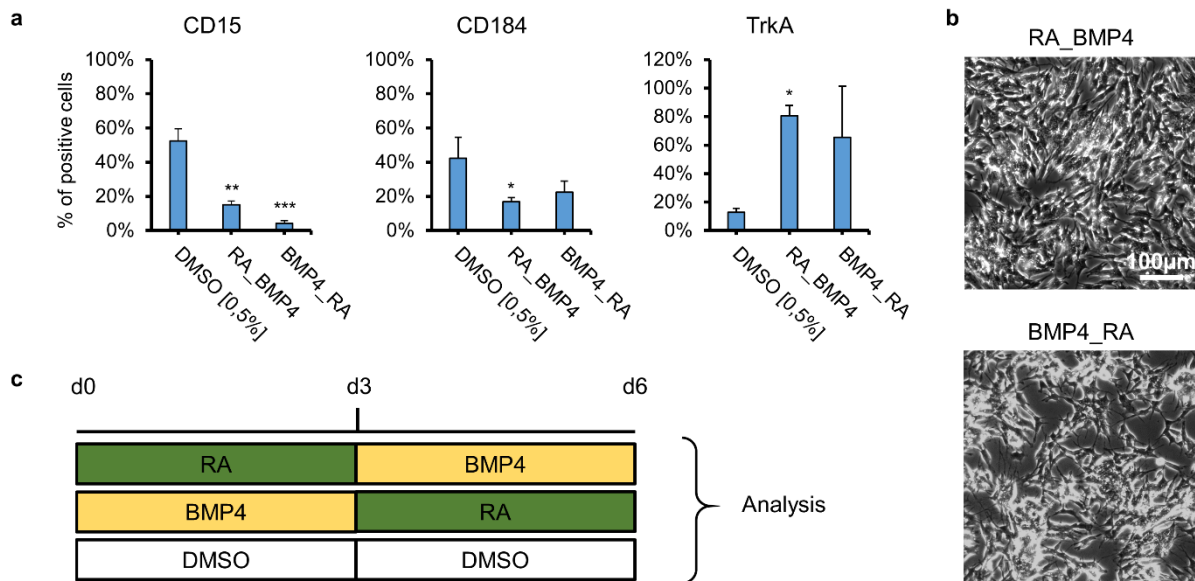

**Supplementary Figure S12.** For consecutive treatment with BMP4 and RA, the sequence of applying the respective treatment might be of importance. **(a)** Reduction of CD15 expression was higher, when cells were first treated with BMP4, whereas prior treatment with RA more prominently affected CD184 and TrkA expression.  $n \geq 3$ ;  $*p \leq 0.05$ ,  $**p \leq 0.01$ ,  $***p \leq 0.001$  in a one-way ANOVA followed by Bonferroni's multiple comparison test. **(b)** Furthermore, the morphological changes observed after the treatments were found to differ depending on the order in which RA and BMP4 were applied. **(c)** Schematic of the treatment paradigms applied.

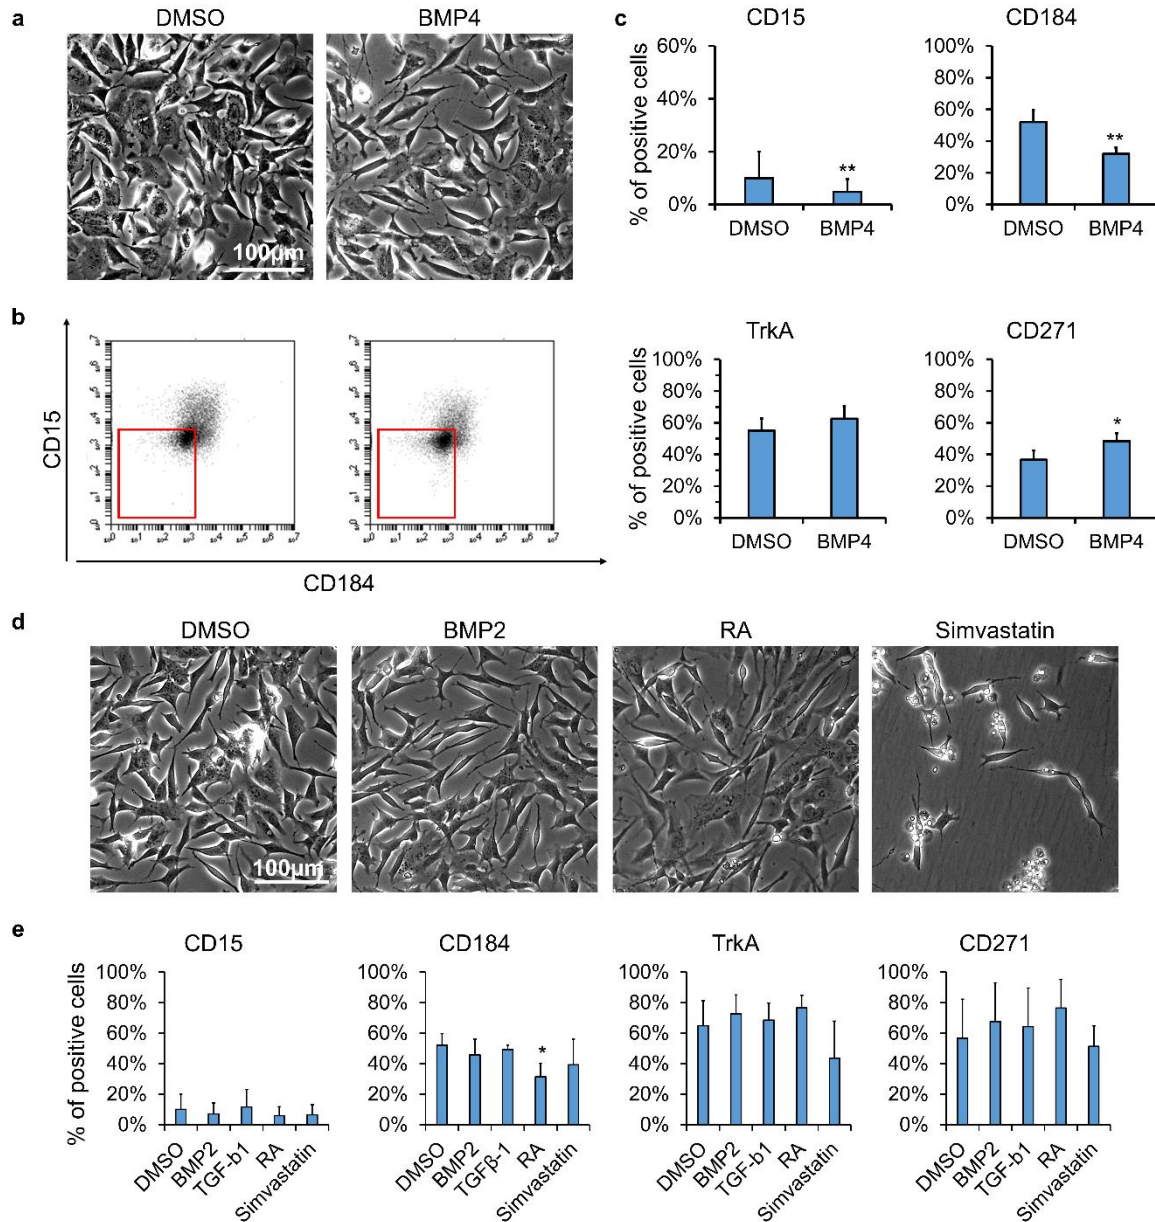

**Supplementary Figure S13.** Effects of a subset of small molecules in 15% FBS medium. SH-SY5Y cells were treated for 3 days with the above named small molecules. **(a)** Morphological changes with neurite-like outgrowths were observed after BMP4 treatment. **(b)** Bivariate plots showing the increase of the CD15<sup>-</sup>/CD184<sup>-</sup> double-negative subpopulation following 3day 10ng/mL BMP4 treatment. **(c)** Quantification of flow cytometric data.  $n \geq 3$ ; \* $p \leq 0.05$ , \*\* $p \leq 0.01$  in an unpaired two-tailed Student's t-test. **(d)** Phase contrast images of the cells after 3day treatment with 10ng/mL BMP2, 10 $\mu$ M RA and 10 $\mu$ M Simvastatin, a known promoter of BMP expression. **(e)** Quantification of flow cytometry data.  $n \geq 3$ , \* $p \leq 0.05$ , in a one-way ANOVA followed by Dunnett's multiple testing comparing all values with the DMSO control.

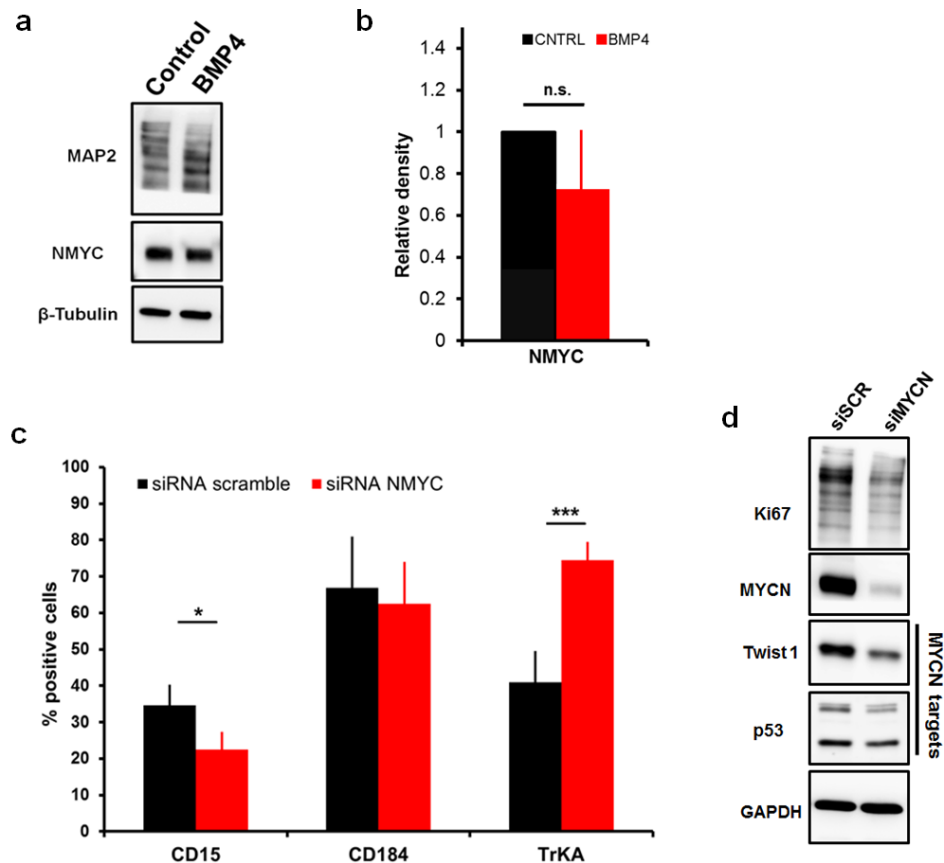

**Supplementary Figure S14.** BMP4 treatment and siRNA-mediated knockdown of *NMYC* in BE(2)-M17 cells. **(a)** MAP2 showed a similar trend towards enhancement after BMP4 treatment as Synapsin without reaching significance (n=3; see **Figure 5 d**). **(b)** In contrast to SH-SY5Y cells (see **Figure 5 e**), no overt changes on NMYC protein content were discernible in BE(2)-M17 cells after BMP4 treatment when applying the same regimen (10 ng/mL over 3 days). **(c)** After 2 days of siRNA treatment (*NMYC* vs. scramble control), surface marker changes and protein content were assessed. *NMYC* knockdown resulted in decreased CD15 and increased TrkA surface expression (n=4). **(d)** Immunoblot analysis of *NMYC* knockdown by siRNA and resulting effect on proliferative marker ki-67 and *NMYC* targets.

## Supplementary Materials and Methods

**Supplementary Table S1** Antibodies used for the small molecule screen

| <b>Antibody</b> | <b>Conjugated</b> | <b>Clone</b> | <b>Company</b>  | <b>Reference #</b> | <b>Dilution</b> |
|-----------------|-------------------|--------------|-----------------|--------------------|-----------------|
| <b>CD 15</b>    | FITC              | H198         | eBioscience®    | 11-0159-42         | 1:50            |
| <b>CD 24</b>    | eFluor780         | eBio SN3     | eBioscience®    | 47-0247            | 1:50            |
| <b>CD 44</b>    | APC               | IM7          | eBioscience®    | 17-0441-83         | 1:50            |
| <b>CD 57</b>    | eFluor460         | TB01         | eBioscience®    | 48-0577            | 1:50            |
| <b>CD 184</b>   | PerCP-Cy5.5       | 12G5         | BD Pharmingen™  | 560670             | 1:50            |
| <b>TrkA</b>     | PE                | REA430       | Miltenyi Biotec | 130-106-606        | 1:50            |



**Supplementary Table S2** Small molecules

| <b>Molecule</b>                  | <b>Concentration</b>  | <b>Company</b>     | <b>Reference #</b> |
|----------------------------------|-----------------------|--------------------|--------------------|
| <b>10058-F4</b>                  | 50 $\mu$ M            | Santa Cruz         | Sc-213577          |
| <b>ACC55649</b>                  | 100 nM                | Tocris bioscience  | 2436               |
| <b>AM580</b>                     | 500 nM                | Santa Cruz         | Sc-203505          |
| <b>bFGF</b>                      | 20 ng/mL              | PreproTech         | 100-18C            |
| <b>BMP2</b>                      | 10 ng/mL;<br>100ng/mL | PreproTech         | 120-02             |
| <b>BMP4</b>                      | 10 ng/ml; 100ng/mL    | PreproTech         | 120-05ET           |
| <b>CD2665</b>                    | 100 nM                | Santa Cruz         | Sc-293988          |
| <b>Chir99</b>                    | 6 $\mu$ M             | Tocris bioscience  | 4423               |
| <b>Dobutamin</b>                 | 10 $\mu$ M            | Sigma              | D0676              |
| <b>Dorsomorphin</b>              | 1 $\mu$ M             | Stemgent           | 04-0024            |
| <b>EGF</b>                       | 20 ng/mL              | PreproTech         | AF-100-15          |
| <b>FGF8</b>                      | 100 $\mu$ g/mL        | PreproTech         | 100-25             |
| <b>GW5074</b>                    | 1 $\mu$ M             | Sigma-Aldrich      | G6416              |
| <b>Hyaluronic Acid</b>           | 1 mg/mL               | R&D Systems        | GLR003             |
| <b>LPA</b>                       | 5 $\mu$ M             | Santa Cruz         | Sc-201053          |
| <b>MGCD0103</b>                  | 10 $\mu$ M            | Sellenckchem       | S1122              |
| <b>Mitomycin-c</b>               | 3 $\mu$ M             | Sigma Life Science | M0503              |
| <b>NGF</b>                       | 100 ng/mL             | PreproTech         | 450-01             |
| <b>Olumoucine</b>                | 10 $\mu$ M            | Sigma Life Science | O08864             |
| <b>PD184352</b>                  | 1 $\mu$ M             | Sigma              | PZ0181             |
| <b>Retinoic Acid (all-trans)</b> | 10 $\mu$ M            | Sigma              | R2625              |
| <b>RO41-5253</b>                 | 50 nM                 | Santa Cruz         | Sc-471345          |
| <b>Roscovitine</b>               | 2.5 $\mu$ M           | Sigma Life Science | R7772              |
| <b>SB202190</b>                  | 1.5 $\mu$ M           | Sellenckchem       | 1077               |
| <b>SB431542</b>                  | 10 $\mu$ M            | Miltenyi Biotec    | 130-097-448        |
| <b>SDF-1<math>\alpha</math></b>  | 20 nM                 | PreproTech         | 300-28A            |
| <b>Shh</b>                       | 100 ng/mL             | R&D Systems        | 1314-SH            |
| <b>Sildenafil</b>                | 10 $\mu$ M            | Sigma              | PZ0003             |
| <b>Simvastatin</b>               | 10 $\mu$ M            | Sigma              | S6196              |
| <b>SP600125</b>                  | 10 $\mu$ M            | Sellenckchem       | S1460              |
| <b>TGF-<math>\beta</math>1</b>   | 2 ng/mL               | PreproTech         | 100-21             |
| <b>U0126</b>                     | 5 $\mu$ M             | Sigma Aldrich      | U120               |
| <b>U73122</b>                    | 2 $\mu$ M             | Tocris             | 1268               |
| <b>VPA</b>                       | 2 mM                  | Sigma              | P4543              |
| <b>Y27632</b>                    | 10 $\mu$ M            | Selleckchem        | S1049              |

**Supplementary Table S3** Antibodies used for flow cytometry

| <b>Conjugated</b>          | <b>Antibody</b> | <b>Clone</b> | <b>Company</b>     | <b>Reference #</b> | <b>Dilution</b> |
|----------------------------|-----------------|--------------|--------------------|--------------------|-----------------|
| <b>FITC</b>                | CD15            | H198         | eBioscience®       | 11-0159-42         | 1:50            |
|                            | CD24            | eBioSN3      | eBioscience®       | 11-0247-42         | 1:50            |
|                            | CD29            | TS2/16       | eBioscience®       | 11-0299-42         | 1:50            |
|                            | CD49b           | eBioY418     | eBioscience®       | 11-0498-42         | 1:50            |
|                            | CD49e           | eBioSAM-1    | eBioscience®       | 53-0469-42         | 1:50            |
|                            | CD57            | TBO1         | eBioscience®       | 11-0577-42         | 1:50            |
| <b>AlexaFluor®<br/>488</b> | CD166           | 3A6          | AbD<br>Serotec®    | MCA<br>1926A488    | 1:50            |
| <b>PE</b>                  | CD29            | TS2/16       | eBioscience®       | 12-0299-42         | 1:50            |
|                            | CD49d           | 9F10         | eBioscience®       | 12-0499-42         | 1:50            |
|                            | CD57            | TB01         | eBioscience®       | 12-0577-42         | 1:50            |
|                            | CD171           | eBio5G3      | eBioscience®       | 12-1719-42         | 1:50            |
|                            | CD184           | 12G5         | eBioscience®       | 12-9999-42         | 1:50            |
|                            | CD230           | 4D5          | eBioscience®       | 12-9230-42         | 1:50            |
|                            | TrkA            | REA430       | Miltenyi<br>Biotec | 130-106-606        | 1:50            |
| <b>APC</b>                 | CD29            | TS2/16       | eBioscience®       | 17-0299-42         | 1:50            |
|                            | CD44            | IM7          | eBioscience®       | 17-0441-83         | 1:50            |
|                            | CD49c           | P1B5         | eBioscience®       | 17-0494-42         | 1:500           |
|                            | CD133           | AC1/133      | Miltenyi<br>Biotec | 130-090-826        | 1:50            |
|                            | CD184           | 12G5         | eBioscience®       | 17-9999-42         | 1:50            |
| <b>AlexaFluor®<br/>647</b> | CD271           | C40-1457     | BDBioscienc<br>es  | 560326             | 1:50            |

**Supplementary Table S4** Antibodies used for immunocytochemistry

| <b>Antibody</b>  | <b>Conjugated</b> | <b>Clone</b> | <b>Company</b>  | <b>Reference #</b> | <b>Dilution</b> |
|------------------|-------------------|--------------|-----------------|--------------------|-----------------|
| Ki67             | Rabbit            | MM1          | Novocastra      | NCL-Ki67p          | 1:1000          |
| DCX              | Goat              | C-18         | Santa Cruz      | Sc-8066            | 1:200           |
| TUJ1             | Mouse             | TUJ1         | Covance         | MMS-435P           | 1:1000          |
| NCAM             | Mouse             | F-4          | Santa Cruz      | Sc-106             | 1:200           |
| SOX2             | Goat              |              | R&D Systems     | AF2018             | 1:500           |
| YAP1             | Rabbit            | H-125        | Santa Cruz      | Sc-15407           | 1:100           |
| CD24             | Mouse             | SN3          | Santa Cruz      | Sc-19585           | 1:100           |
| CD29-APC         | Mouse             | TS2/16       | eBioscience®    | 17-0299-42         | 1:50            |
| CD44-APC         | Rat               | IM7          | eBioscience®    | 17-0441-83         | 1:50            |
| CD49c-APC        | Mouse             | PIB5         | eBioscience®    | 17-0494-42         | 1:50            |
| CD57             | Mouse             | HNK-1        | BDPharmingen®   | 559048             | 1:100           |
| CD15-FITC        | Mouse             | H198         | eBioscience®    | 11-0159-42         | 1:50            |
| CD133-APC        | Mouse             | AC1/133      | Miltenyi Biotec | 130-090-826        | 1:50            |
| CD171-PE         | Mouse             | eBio5G3      | eBioscience®    | 12-1719-42         | 1:50            |
| CD271-<br>AF647® | Mouse             | C40-<br>1457 | BDBiosciences   | 560326             | 1:50            |

**Supplementary Table S5** Buffers and other products for western blot

| <b>Buffer</b>          | <b>Composition</b>                          | <b>Company</b> | <b>Reference #</b> |
|------------------------|---------------------------------------------|----------------|--------------------|
| <b>Sample buffer</b>   | 0.4 M Tris-HCl (pH6.8)                      | Carl Roth®     | 9090.3             |
|                        | 6% SDS                                      | SERVA          |                    |
|                        | 30% Glycerol                                | Carl Roth®     | 3783.1             |
| <b>Running buffer</b>  | 25mM Tris base                              | AppliChem      | A1379              |
|                        | 192mM Glycine                               | AppliChem      | A1377              |
|                        | 1% SDS                                      | SERVA          |                    |
| <b>Transfer buffer</b> | 25mM Tris base                              | AppliChem      | A1379              |
|                        | 192mM Glycine                               | AppliChem      | A1377              |
|                        | 20% methanol                                |                |                    |
| <b>Blocking buffer</b> | 4% milk powder in PBST                      | Sigma-Aldrich® | 70166              |
| <b>PBS</b>             | 9.54g PBS buffer powder<br>H <sub>2</sub> O | AppliChem      | A0965,9010         |
| <b>PBST</b>            | 0.2% Tween in 1x PBS                        | AppliChem      | A1389              |

**Supplementary Table S6** Antibodies for western blot

| Antibody                                                    | Host   | Company    | Reference # | Dilution |
|-------------------------------------------------------------|--------|------------|-------------|----------|
| GAPDH (ID4)                                                 | Mouse  | Santa Cruz | Sc-59540    | 1:5000   |
| $\beta$ -Tubulin                                            | Rabbit | Abcam      | Ab6046      | -        |
| NMYC                                                        | Mouse  | Santa Cruz | Sc-53993    | 1:500    |
| DCX                                                         | Goat   | Santa Cruz | Sc-8066     | 1:500    |
| MAP2                                                        | Mouse  | Millipore  | MAB3418     | 1:200    |
| Synapsin                                                    | Rabbit | Sigma      | S193        | 1:500    |
| Precision plus Protein <sup>TM</sup><br>WesternCTM Standard |        | BioRad     | 161-0376    | 1:10000  |

**Supplementary Table S7** RNA interference

| Name     | Supplier | Catalog No | Final conc. | Sequence                          |
|----------|----------|------------|-------------|-----------------------------------|
| siMYCN_1 | Origene  | SR303027A  | 50nM        | CGCUGAUACAU<br>AACUAAAUUUG<br>ATA |
| siMYCN_2 | Origene  | SR303027B  | 50nM        | AGUUCAUACCU<br>AAGUACUGUAA<br>UAA |
| siMYCN_3 | Origene  | SR303027C  | 50nM        | AGCUGAUCCUC<br>AAACGAUGCCU<br>UCC |
| siSCRL   | Origene  | SR30004    | 50nM        | CGUAAUACGCG<br>UAUAAUACGCG<br>UAT |

## References

Hindley, C. J. *et al.* The Hippo pathway member YAP enhances human neural crest cell fate and migration. *Sci. Rep.* **6**, 23208 (2016).

Pruszek, J. *et al.* CD15, CD24, and CD29 define a surface biomarker code for neural lineage differentiation of stem cells. *Stem Cells.* **27**, 2928-40 (2009).

Yu, F.X. *et al.* Regulation of the Hippo-YAP pathway by G-protein-coupled receptor signaling. *Cell.* **150**, 780-91 (2012).
